# Supplementary material for: Assessment of the stability of citrate-buffered piperacillin/tazobactam for continuous infusion when stored in two commercially available elastomeric devices for outpatient parenteral antimicrobial chemotherapy: a study compliant with the NHS Yellow Cover Document requirements
Source: PubMed Central journal article supplement — Eur J Hosp Pharm. 2020 Sep 25;29(4):212–6. doi: 10.1136/ejhpharm-2020-002340 (PMC9251159; doi:10.1136/ejhpharm-2020-002340), 2020-09-25
Supplement: ejhpharm-2020-002340supp001.pdf [file ejhpharm-2020-002340supp001.pdf]

**Table S1: pH of piperacillin/ tazobactam solutions during storage**

| Time point | FOLFusor LV 10 (Baxter) |                         |                     |                         | Easypump II (B. Braun) |                         |                     |                         |
|------------|-------------------------|-------------------------|---------------------|-------------------------|------------------------|-------------------------|---------------------|-------------------------|
|            | 25 mg/mL average pH     | Difference from initial | 90 mg/mL average pH | Difference from initial | 25 mg/mL average pH    | Difference from initial | 90 mg/mL average pH | Difference from initial |
| t=0        | 6.70                    | n/a                     | 6.37                | n/a                     | 6.73                   | n/a                     | 6.38                | n/a                     |
| t= 7       | 6.61                    | 0.09                    | 6.26                | 0.11                    | 6.51                   | 0.22                    | 6.16                | 0.22                    |
| t= 10 (11) | 6.50                    | 0.20                    | 6.13                | 0.24                    | 6.41                   | 0.32                    | 6.12                | 0.26                    |
| t= 13      | 6.50                    | 0.20                    | 6.11                | 0.25                    | 6.42                   | 0.31                    | 6.07                | 0.31                    |
| t= 13+1    | 6.20                    | 0.50                    | 5.77                | 0.60                    | 6.25                   | 0.48                    | 5.80                | 0.58                    |

**Table S2: Particle counts for 25 mg/mL Piperacillin/tazobactam solutions during storage in FOLFusor LV10 (Baxter) devices**

| Particle counts per device (241 mL) |            |            |                 |             |            |                 |            |
|-------------------------------------|------------|------------|-----------------|-------------|------------|-----------------|------------|
| Timepoint                           | Sample ID  | 10µm count | Mean 10µm count | 95 % CI (±) | 25µm count | Mean 25µm count | 95% CI (±) |
| 1                                   | 210-25-B-1 | 5415.27    | 4585            | 829         | 1060.4     | 578             | 555        |
|                                     | 210-25-B-2 | 4306.67    |                 |             | 79.53      |                 |            |
|                                     | 210-25-B-3 | 4031.93    |                 |             | 595.27     |                 |            |
| 7                                   | 210-25-B-1 | 272.33     | 149             | 136         | 224.13     | 96              | 126        |
|                                     | 210-25-B-2 | 144.6      |                 |             | 48.2       |                 |            |
|                                     | 210-25-B-3 | 31.33      |                 |             | 16.87      |                 |            |
| 10                                  | 210-25-B-1 | 65.07      | 102             | 89          | 48.2       | 59              | 20         |
|                                     | 210-25-B-2 | 48.2       |                 |             | 48.2       |                 |            |
|                                     | 210-25-B-3 | 192.8      |                 |             | 79.53      |                 |            |
| 13                                  | 210-25-B-1 | 79.53      | 128             | 55          | 65.07      | 59              | 28         |
|                                     | 210-25-B-2 | 127.73     |                 |             | 31.33      |                 |            |
|                                     | 210-25-B-3 | 175.93     |                 |             | 79.53      |                 |            |
| 13+1                                | 210-25-B-1 | 127.73     | 133             | 11          | 0          | 21              | 20         |
|                                     | 210-25-B-2 | 144.6      |                 |             | 31.33      |                 |            |
|                                     | 210-25-B-3 | 127.73     |                 |             | 31.33      |                 |            |

**Table S3: Particle counts for 90 mg/mL piperacillin/tazobactam solutions during storage in the FOLFusor LV10 (Baxter) devices**

| 90 mg/mL concentration counts per device (241 mL) |            |                  |                       |         |                  |                       |        |
|---------------------------------------------------|------------|------------------|-----------------------|---------|------------------|-----------------------|--------|
| Timepoint                                         | Sample ID  | 10 $\mu$ m count | Mean 10 $\mu$ m count | 95 % CI | 25 $\mu$ m count | Mean 25 $\mu$ m count | 95% CI |
| 1                                                 | 210-90-B-1 | 1236.33          | 1328                  | 295     | 144.6            | 92                    | 52     |
|                                                   | 210-90-B-2 | 1125.47          |                       |         | 65.07            |                       |        |
|                                                   | 210-90-B-3 | 1621.93          |                       |         | 65.07            |                       |        |
| 7                                                 | 210-90-B-1 | 1253.2           | 996                   | 352     | 995.33           | 642                   | 339    |
|                                                   | 210-90-B-2 | 595.27           |                       |         | 320.53           |                       |        |
|                                                   | 210-90-B-3 | 1139.93          |                       |         | 609.73           |                       |        |
| 10                                                | 210-90-B-1 | 209.67           | 680                   | 900     | 16.87            | 327                   | 510    |
|                                                   | 210-90-B-2 | 113.27           |                       |         | 48.2             |                       |        |
|                                                   | 210-90-B-3 | 1718.33          |                       |         | 915.8            |                       |        |
| 13                                                | 210-90-B-1 | 209.67           | 306                   | 83      | 65.07            | 145                   | 89     |
|                                                   | 210-90-B-2 | 354.27           |                       |         | 127.73           |                       |        |
|                                                   | 210-90-B-3 | 354.27           |                       |         | 241              |                       |        |
| 13+1                                              | 210-90-B-1 | 498.87           | 279                   | 191     | 0                | 10                    | 18     |
|                                                   | 210-90-B-2 | 175.93           |                       |         | 31.33            |                       |        |
|                                                   | 210-90-B-3 | 161.47           |                       |         | 0                |                       |        |

**Table S4: Particle counts for 25 mg/mL piperacillin/tazobactam solutions during storage in Easypump II (B. Braun) devices**

| 25 mg/mL concentration counts per device (241 mL) |            |                  |                       |         |                  |                       |        |
|---------------------------------------------------|------------|------------------|-----------------------|---------|------------------|-----------------------|--------|
| Timepoint                                         | Sample ID  | 10 $\mu$ m count | Mean 10 $\mu$ m count | 95 % CI | 25 $\mu$ m count | Mean 25 $\mu$ m count | 95% CI |
| 1                                                 | 210-25-E-1 | 1253.2           | 1607                  | 441     | 368.73           | 193                   | 184    |
|                                                   | 210-25-E-2 | 1542.4           |                       |         | 48.2             |                       |        |
|                                                   | 210-25-E-3 | 2024.4           |                       |         | 161.47           |                       |        |
| 7                                                 | 210-25-E-1 | 272.33           | 353                   | 346     | 144.6            | 236                   | 313    |
|                                                   | 210-25-E-2 | 691.67           |                       |         | 547.07           |                       |        |
|                                                   | 210-25-E-3 | 96.4             |                       |         | 16.87            |                       |        |
| 11                                                | 210-25-E-1 | 113.27           | 118                   | 28      | 65.07            | 38                    | 28     |
|                                                   | 210-25-E-2 | 144.6            |                       |         | 31.33            |                       |        |
|                                                   | 210-25-E-3 | 96.4             |                       |         | 16.87            |                       |        |
| 13                                                | 210-25-E-1 | 337.4            | 257                   | 189     | 257.87           | 140                   | 147    |
|                                                   | 210-25-E-2 | 368.73           |                       |         | 161.47           |                       |        |
|                                                   | 210-25-E-3 | 65.07            |                       |         | 0                |                       |        |
| 13+1                                              | 210-25-E-1 | 48.2             | 118                   | 82      | 31.33            | 38                    | 28     |

**Table S5: Particle counts of 90 mg/mL piperacillin/tazobactam solutions during storage in Easypump II (B. Braun) devices**

| 90 mg/mL concentration counts per device (241 mL) |            |                  |                       |         |                  |                       |        |
|---------------------------------------------------|------------|------------------|-----------------------|---------|------------------|-----------------------|--------|
| Timepoint                                         | Sample ID  | 10 $\mu$ m count | Mean 10 $\mu$ m count | 95 % CI | 25 $\mu$ m count | Mean 25 $\mu$ m count | 95% CI |
| 1                                                 | 210-90-E-1 | 161.47           | 1109                  | 1054    | 0                | 96                    | 109    |
|                                                   | 210-90-E-2 | 2024.4           |                       |         | 96.4             |                       |        |
|                                                   | 210-90-E-3 | 1139.93          |                       |         | 192.8            |                       |        |
| 7                                                 | 210-90-E-1 | 79.53            | 353                   | 259     | 16.87            | 236                   | 217    |
|                                                   | 210-90-E-2 | 385.6            |                       |         | 241              |                       |        |
|                                                   | 210-90-E-3 | 595.27           |                       |         | 450.67           |                       |        |
| 11                                                | 210-90-E-1 | 48.2             | 165                   | 218     | 0                | 32                    | 33     |
|                                                   | 210-90-E-2 | 416.93           |                       |         | 65.07            |                       |        |
|                                                   | 210-90-E-3 | 31.33            |                       |         | 31.33            |                       |        |
| 13                                                | 210-90-E-1 | 337.4            | 391                   | 308     | 257.87           | 257                   | 225    |
|                                                   | 210-90-E-2 | 113.27           |                       |         | 31.33            |                       |        |
|                                                   | 210-90-E-3 | 723              |                       |         | 482              |                       |        |
| 13+1                                              | 210-90-E-1 | 65.07            | 155                   | 82      | 0                | 16                    | 16     |

**Table S6. HPLC assay results for concentration of tazobactam in FOLFusor LV10 (Baxter) devices**

| Timepoint | 90 mg/mL Total drug combination* |         | 25 mg/mL Total drug combination** |         |
|-----------|----------------------------------|---------|-----------------------------------|---------|
|           | TAZ % Remaining                  | 95 % CI | TAZ % Remaining                   | 95 % CI |
| 0         | 100% (10.45 $\pm$ 0.07 mg/mL)    | 0.7     | 100% (3.03 $\pm$ 0.03 mg/mL)      | 1.0     |
| 7         | 101.6                            | 0.3     | 101.3                             | 0.3     |
| 10        | 99.6                             | 0.2     | 99.9                              | 0.5     |
| 13        | 98.7                             | 0.4     | 99.2                              | 0.4     |
| 13+1      | 98.0                             | 0.2     | 100.9                             | 0.6     |

\*90 mg/ml total drug concentration: 80 mg piperacillin/10 mg tazobactam

\*\*25 mg/ml total drug concentration: 22 mg piperacillin/3 mg tazobactam

**Table S7. HPLC assay results for concentration of piperacillin in FOLFusor LV10 (Baxter) devices**

| Timepoint | 90 mg/mL Total drug combination* |         | 25 mg/mL Total drug combination** |         |
|-----------|----------------------------------|---------|-----------------------------------|---------|
|           | PIP % Remaining                  | 95 % CI | PIP % Remaining                   | 95 % CI |
| 0         | 100% (83.6 $\pm$ 0.3 mg/mL)      | 0.4     | 100% (24.1 $\pm$ 0.2 mg/mL)       | 0.9     |
| 7         | 101.3                            | 0.5     | 101.6                             | 0.3     |
| 10        | 99.7                             | 0.2     | 100.3                             | 0.4     |
| 13        | 98.7                             | 0.3     | 99.7                              | 0.3     |
| 13+1      | 98.0                             | 0.2     | 100.9                             | 0.6     |

\*90 mg/ml total drug concentration: 80 mg piperacillin/10 mg tazobactam

\*\*25 mg/ml total drug concentration: 22 mg piperacillin/3 mg tazobactam

**Table S8. HPLC assay results for concentration of tazobactam in Easypump II (B. Braun) devices**

| 90 mg/mL Total drug combination* |                        |         | 25 mg/mL Total drug combination** |         |
|----------------------------------|------------------------|---------|-----------------------------------|---------|
| Timepoint                        | TAZ % Remaining        | 95 % CI | TAZ % Remaining                   | 95 % CI |
| 0                                | 100% (9.63±0.09 mg/mL) | 0.9     | 100% (2.72±0.06 mg/mL)            | 2.0     |
| 7                                | 101.7                  | 0.2     | 100.7                             | 0.4     |
| 11                               | 101.3                  | 1.5     | 102.7                             | 0.2     |
| 13                               | 100.4                  | 0.1     | 98.7                              | 1.6     |
| 13+1                             | 100.9                  | 0.6     | 101.5                             | 0.1     |

\*90 mg/ml total drug concentration: 80 mg piperacillin/10 mg tazobactam

\*\*25 mg/ml total drug concentration: 22 mg piperacillin/3 mg tazobactam

**Table S9. HPLC assay results for concentration of piperacillin in Easypump II (B. Braun) devices**

| 90 mg/mL Total drug combination* |                       |         | 25 mg/mL Total drug combination** |         |
|----------------------------------|-----------------------|---------|-----------------------------------|---------|
| Timepoint                        | PIP % Remaining       | 95 % CI | PIP % Remaining                   | 95 % CI |
| 0                                | 100% (77.6±0.6 mg/mL) | 0.8     | 100% (21.9±0.4 mg/mL)             | 2.1     |
| 7                                | 101.7                 | 0.1     | 100.9                             | 0.4     |
| 11                               | 101.1                 | 1.2     | 102.2                             | 0.1     |
| 13                               | 100.7                 | 0.1     | 98.9                              | 1.5     |
| 13+1                             | 100.7                 | 0.6     | 101.0                             | 0.1     |

\*90 mg/ml total drug concentration: 80 mg piperacillin/10 mg tazobactam

\*\*25 mg/ml total drug concentration: 22 mg piperacillin/3 mg tazobactam
